# Supplementary material for: Modeling the thermostability of surface functionalisation by oxygen, hydroxyl, and water on nanodiamonds
Source: Royal Society of Chemistry journal article supplement (doi:10.1039/c1nr10108k), 2011-01-01
Supplement: c1nr10108k.pdf [file c1nr10108k.pdf]

## Modeling the Thermostability of Surface Functionalisation by Oxygen, Hydroxyl, and Water in Nanodiamonds

Lin Lai\*, Amanda S. Barnard

*CSIRO Materials Science and Engineering, Clayton, VIC, 3168, Australia*

*E-mail: lin.lai@csiro.au*

### Models

To establish a frame of reference, we first studied the bare nanodiamond structures. In the case of the bare C<sub>705</sub> nanodiamond, there are ~19.3% of sp<sup>2</sup>-bonded, ~52.9% of sp<sup>3</sup>-bonded, and ~27.8% of sp<sup>2+x</sup>-bonded C atoms. The average C–C bond length was found to be 1.52 ± 0.06 Å. For the bare C<sub>837</sub> nanodiamond, the fraction of sp<sup>2</sup>-, sp<sup>3</sup>-, and sp<sup>2+x</sup>-bonded C atoms is ~33.0%, ~37.4%, and ~29.6%, respectively. The average C–C bond length was found to be 1.50±0.06 Å. All structural variations presented below will be compared with these values, and all adsorption configurations will be described as being stable or unstable with respect to these structures. As demonstrated in previous studies, adsorption and/or desorption will invoke a structural response, corresponding to changes in the structure of different facets (and possibly the particle as a whole), which will in turn influence the type of chemical character of the C atoms exposed to their surroundings.

### Oxygen (O) Adsorption

The results of coordination and bond length variations are presented in Table 1. We can see that, in general, covalent O-adsorption invokes dramatic structural changes in the coordination of the C atoms, as well as a slight variation in their shapes. Compared with bare nanodiamonds, the O- $\{100\}$ -functionalisation of the C<sub>705</sub> nanodiamond (Figure 2(a) of main text) results in a dramatic increase in the fraction of the sp<sup>2</sup>-bonded C atoms and a great decrease in the fraction of the sp<sup>2+x</sup>-bonded C atoms, while the fraction of sp<sup>3</sup>-bonded C atoms remains unchanged. In contrast, the O- $\{111\}$ -functionalisation generates a dramatic

increase in the fraction of the  $sp^3$ -hybridised C atoms and a great decrease in the fraction of the  $sp^2$ - and  $sp^{2+x}$ -bonded C atoms. This is expected, since surface graphitization is known to be largely restricted to the  $\{111\}$  facets. Like the O- $\{111\}$ -functionalisation, a similar trend is found in the O- $\{110\}$ -functionalised  $C_{705}$  nanodiamond, although the coordination changes are moderate. In the configurations of the  $C_{705}$  nanodiamond with unsaturated  $\{100\}$ ,  $\{110\}$ , or  $\{111\}$  facets, there are a significant increase in the fraction of the  $sp^3$ -hybridised C atoms and a great decrease in the fraction of the  $sp^2$ - and  $sp^{2+x}$ -bonded C atoms. Moreover, full O-termination results in nearly 100% of  $sp^3$ -hybridised C atoms.

In case of the  $C_{837}$  nanodiamond, we find that O- $\{100\}$ -functionalisation induces a significant increase in the fraction of the  $sp^2$ -bonded C atoms, a slight decrease in the fraction of the  $sp^{2+x}$ -bonded C atoms, and a dramatic decrease in the fraction of the  $sp^3$ -bonded C atoms, compared with bare  $C_{837}$  nanodiamond. In contrast, the O- $\{111\}$ - and full-O-functionalisation generate more dramatic structural changes, particularly in the fraction of  $sp^3$ -bonded C atoms, as surface graphitization is prevented.

The average length of the C–O bonds in the O- $\{100\}$ -functionalised nanodiamonds is much shorter than those in alternative configurations. Given the typical bond length of C–O single and double bonds, we attribute the C–O bond on the  $\{100\}$  surfaces to be double bonds and attribute those on the  $\{111\}$  and  $\{110\}$  facets to be single bonds. This is further supported by the existence of the oxygen dimers on the nanodiamond surfaces (mostly on the  $\{111\}$  and  $\{110\}$  facets, see Figure 2 of main text) after geometrical optimization. These dimers saturated the unpaired electrons in the adsorbed O atoms forming a C–O–O–C connection and further stabilize the configuration. The structural changes are found to differ distinctly between the O- $\{100\}$ -terminated  $C_{705}$  and  $C_{837}$  nanoparticles, although the two nanoparticles have a same number of adsorption sites on the  $\{100\}$  facets. Complete lack of passivation of the  $\{111\}$  facets allows for bucky-diamond surface reconstructions, which are

known to be more efficient when the  $\{111\}|\{111\}$  edges are present (see Ref 20 in main text).

### Hydroxyl (OH) Adsorption

The results of coordination and bond length variations are presented in Table 2. We can see that, generally, the OH-functionalisation of the  $\{100\}$  and  $\{110\}$  facets induces only a slight structural changes, while the passivation of the  $\{111\}$  facets gives rise to a significant increase in the fraction of  $sp^3$ -bonded C atoms and a dramatic decrease in the fraction of  $sp^2$ -bonded C atoms. For example, we find nearly 100% of  $sp^3$ -bonded C atoms in the OH- $\{111\}$ -functionalised  $C_{837}$  nanodiamond, which is due to the existence of large number of adsorption sites on the  $\{111\}$  facets of  $C_{837}$  nanoparticle, as well as the lack of the  $\{110\}$  facets.

### Water (H<sub>2</sub>O) Adsorption

The results of coordination and bond length variations in the H<sub>2</sub>O-functionalised  $C_{705}$  and  $C_{837}$  nanodiamonds in the decomposition case and the physisorption case are presented in Table 3 and Table 4, respectively. In the first instance, the obtained results are actually from the OH-terminated nanodiamonds, and we can see they are in good agreement with data for OH-functionalisation (Table 2). The only different is that the error for the C–O bond length is larger for decomposed than for OH-functionalisation. This indicates a larger variation in length distribution of the C–O bonds, which possibly is arose from the H<sub>2</sub> molecules surrounding the nanodiamond, and their residual long ranged interactions with the remaining OH groups. This also indicates that OH-functionalisation of nanodiamonds is nearly unperturbed (except changes in bond length) by the presence of excess H<sub>2</sub> gas. On the other hand, we find little structural changes (C atom hybridisation and average C–C bond length) in H<sub>2</sub>O-physisorbed nanodiamonds, as well as a larger C–O average distance than that in O- and OH-terminated nanodiamonds, confirming the assignment of physical adsorption.

**Table 1.** Fraction (%) of  $sp^1$ -,  $sp^2$ -,  $sp^3$ -, and  $sp^{2+x}$ -bonded C atoms and the average C–C and C–O bond lengths in  $C_{705}$  and  $C_{837}$  nanodiamonds with O-functionalisation.

| Termination Sites       | $sp^1$<br>[%] | $sp^2$<br>[%] | $sp^3$<br>[%] | $sp^{2+x}$<br>[%] | $r$ (C–C)<br>[Å] | $r$ (C–O)<br>[Å] |
|-------------------------|---------------|---------------|---------------|-------------------|------------------|------------------|
| $C_{705}$ {100}         | 0.0           | 32.3          | 52.9          | 14.8              | 1.519±0.050      | 1.195±0.004      |
| $C_{705}$ {110}         | 0.0           | 13.3          | 65.1          | 21.6              | 1.528±0.049      | 1.422±0.084      |
| $C_{705}$ {111}         | 0.0           | 3.4           | 79.0          | 17.6              | 1.538±0.043      | 1.432±0.069      |
| $C_{705}$ {110}&{111}   | 0.6           | 2.3           | 85.8          | 11.3              | 1.542±0.040      | 1.420±0.089      |
| $C_{705}$ {100}&{111}   | 1.7           | 11.6          | 77.3          | 9.4               | 1.540±0.025      | 1.332±0.137      |
| $C_{705}$ {100}&{110}   | 1.7           | 17.6          | 69.5          | 11.2              | 1.539±0.055      | 1.300±0.133      |
| $C_{705}$ full coverage | 0.7           | 5.4           | 91.3          | 2.6               | 1.549±0.041      | 1.395±0.101      |
| $C_{837}$ {100}         | 0.1           | 56.4          | 29.4          | 14.1              | 1.498±0.065      | 1.193±0.008      |
| $C_{837}$ {111}         | 0.6           | 2.3           | 86.3          | 10.9              | 1.543±0.041      | 1.406±0.096      |
| $C_{837}$ full coverage | 0.7           | 7.8           | 90.9          | 0.6               | 1.547±0.029      | 1.377±0.118      |

**Table 2.** Fraction (%) of  $sp^1$ -,  $sp^2$ -,  $sp^3$ -, and  $sp^{2+x}$ -bonded C atoms and the average C–C and C–O bond lengths in  $C_{705}$  and  $C_{837}$  nanodiamonds with OH-functionalisation.

| Termination Sites       | $sp^1$<br>[%] | $sp^2$<br>[%] | $sp^3$<br>[%] | $sp^{2+x}$<br>[%] | $r$ (C–C)<br>[Å] | $r$ (C–O)<br>[Å] |
|-------------------------|---------------|---------------|---------------|-------------------|------------------|------------------|
| $C_{705}$ {100}         | 0.0           | 22.6          | 63.1          | 14.3              | 1.522±0.057      | 1.412±0.009      |
| $C_{705}$ {110}         | 0.0           | 10.8          | 61.4          | 27.8              | 1.529±0.053      | 1.386±0.027      |
| $C_{705}$ {111}         | 0.0           | 1.6           | 77.6          | 20.9              | 1.539±0.041      | 1.411±0.023      |
| $C_{705}$ {110}&{111}   | 0.0           | 0.0           | 89.8          | 10.2              | 1.549±0.037      | 1.424±0.009      |
| $C_{705}$ {100}&{111}   | 0.0           | 2.6           | 81.8          | 15.6              | 1.543±0.039      | 1.409±0.020      |
| $C_{705}$ {100}&{110}   | 0.0           | 5.2           | 82.4          | 12.3              | 1.545±0.053      | 1.411±0.016      |
| $C_{705}$ full coverage | 0.0           | 0.0           | 100.0         | 0.0               | 1.557±0.032      | 1.422±0.013      |
| $C_{837}$ {100}         | 0.0           | 46.2          | 39.8          | 14.0              | 1.502±0.062      | 1.415±0.011      |
| $C_{837}$ {111}         | 0.0           | 0.0           | 91.4          | 8.6               | 1.547±0.028      | 1.424±0.011      |
| $C_{837}$ full coverage | 0.0           | 0.0           | 99.8          | 0.2               | 1.552±0.018      | 1.425±0.017      |

**Table 3.** Fraction (%) of  $sp^1$ -,  $sp^2$ -,  $sp^3$ -, and  $sp^{2+x}$ -bonded C atoms and the average C–C and C–O bond lengths in  $C_{705}$  and  $C_{837}$  nanodiamonds with  $H_2O$  decomposition (OH-termination and  $H_2$  desorption).

| Termination Sites       | $sp^1$<br>[%] | $sp^2$<br>[%] | $sp^3$<br>[%] | $sp^{2+x}$<br>[%] | $r$ (C–C)<br>[Å] | $r$ (C–O)<br>[Å] |
|-------------------------|---------------|---------------|---------------|-------------------|------------------|------------------|
| $C_{705}$ {100}         | 0.0           | 20.6          | 63.3          | 16.2              | 1.523±0.058      | 1.434±0.026      |
| $C_{705}$ {110}         | 0.0           | 12.2          | 60.3          | 27.5              | 1.525±0.051      | 1.465±0.031      |
| $C_{705}$ {111}         | 0.0           | 0.9           | 76.5          | 22.7              | 1.536±0.039      | 1.463±0.024      |
| $C_{705}$ {110}&{111}   | 0.0           | 0.0           | 88.4          | 11.6              | 1.547±0.034      | 1.440±0.016      |
| $C_{705}$ {100}&{111}   | 0.0           | 0.4           | 88.8          | 10.8              | 1.546±0.038      | 1.436±0.033      |
| $C_{705}$ {100}&{110}   | 0.0           | 11.6          | 72.2          | 16.2              | 1.534±0.059      | 1.437±0.027      |
| $C_{705}$ full coverage | 0.0           | 0.0           | 100.0         | 0.0               | 1.557±0.032      | 1.421±0.017      |
| $C_{837}$ {100}         | 0.0           | 47.0          | 35.5          | 17.6              | 1.497±0.058      | 1.444±0.026      |
| $C_{837}$ {111}         | 0.0           | 0.0           | 90.8          | 9.2               | 1.545±0.026      | 1.436±0.015      |
| $C_{837}$ full coverage | 0.0           | 0.0           | 100.0         | 0.0               | 1.552±0.020      | 1.423±0.013      |

**Table 4.** Fraction (%) of  $sp^1$ -,  $sp^2$ -,  $sp^3$ -, and  $sp^{2+x}$ -bonded C atoms and the average C–C and C–O bond lengths in  $C_{705}$  and  $C_{837}$  nanodiamonds with  $H_2O$ -physisorption.

| Termination Sites       | $sp^1$<br>[%] | $sp^2$<br>[%] | $sp^3$<br>[%] | $sp^{2+x}$<br>[%] | $r$ (C–C)<br>[Å] | $r$ (C–O)<br>[Å] |
|-------------------------|---------------|---------------|---------------|-------------------|------------------|------------------|
| $C_{705}$ {100}         | 0.0           | 20.9          | 53.5          | 25.7              | 1.515±0.058      | 1.452±0.039      |
| $C_{705}$ {110}         | 0.0           | 19.3          | 52.9          | 27.8              | 1.515±0.062      | N/A              |
| $C_{705}$ {111}         | 0.0           | 19.0          | 53.0          | 27.9              | 1.516±0.061      | 1.484±0.000      |
| $C_{705}$ {110}&{111}   | 0.0           | 19.4          | 53.0          | 27.5              | 1.515±0.062      | 1.445±0.000      |
| $C_{705}$ {100}&{111}   | 0.0           | 20.4          | 54.2          | 25.4              | 1.516±0.056      | 1.464±0.039      |
| $C_{705}$ {100}&{110}   | 0.0           | 21.4          | 52.8          | 25.8              | 1.516±0.058      | 1.456±0.047      |
| $C_{705}$ full coverage | 0.0           | 20.9          | 54.2          | 25.0              | 1.516±0.057      | 1.468±0.048      |
| $C_{837}$ {100}         | 0.0           | 32.7          | 43.6          | 23.7              | 1.509±0.059      | 1.490±0.015      |
| $C_{837}$ {111}         | 0.0           | 27.2          | 45.9          | 26.9              | 1.511±0.059      | 1.487±0.006      |
| $C_{837}$ full coverage | 0.0           | 24.4          | 49.7          | 25.9              | 1.514±0.055      | 1.491±0.008      |
